# Supplementary material for: Peroxidase mimicking DNAzymes degrade graphene oxide
Source: Royal Society of Chemistry journal article supplement (doi:10.1039/c8nr06535g), 2018-01-01
Supplement: c8nr06535g1.pdf [file c8nr06535g1.pdf]

# **Peroxidase mimicking DNAZymes degrade graphene oxide**

*Rajendra Kurapati, Alberto Bianco\**

University of Strasbourg, CNRS, Immunology, Immunopathology and therapeutic chemistry,  
UPR 3572, 67000 Strasbourg, France

## **Electronic Supplementary Information**

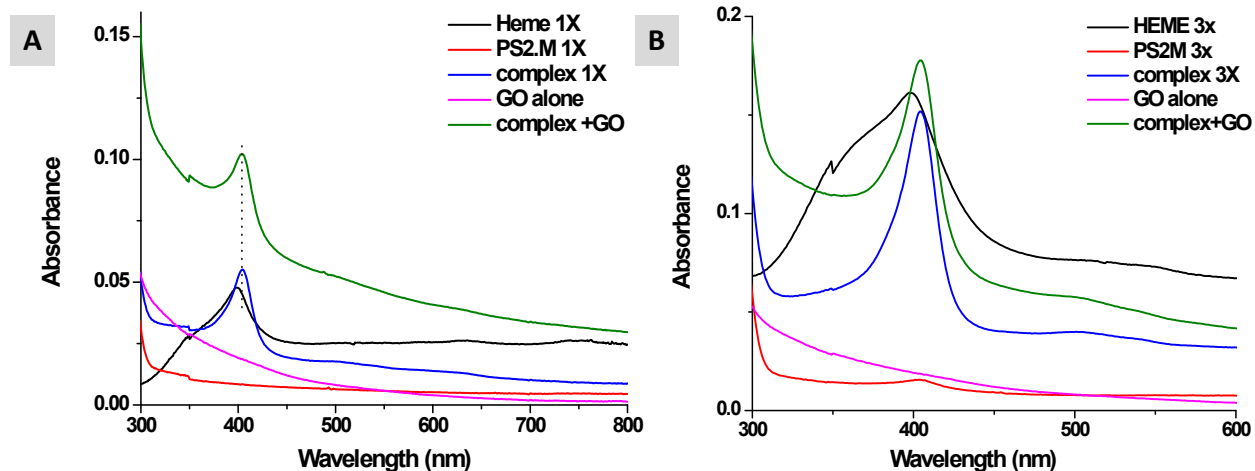

**Figure S1.** UV-vis absorption spectra of the PS2.M-hemin 1× complex (A) and 3× complex (B), compared to PS2.M alone, GO alone, and the complexes in the presence of GO. The spectrum of GO alone is also shown.

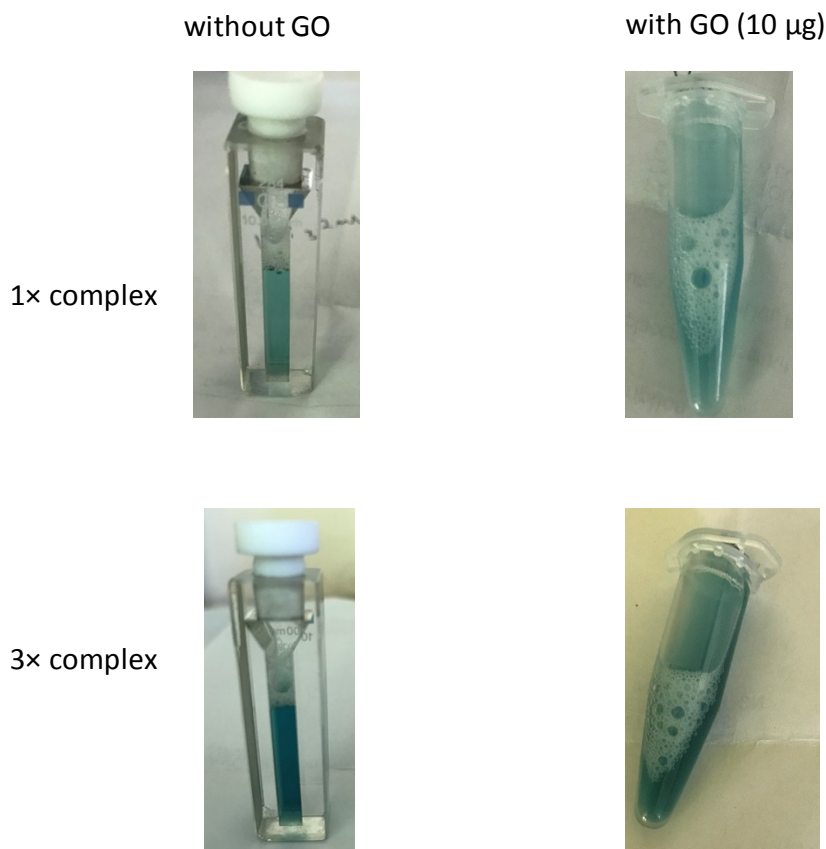

**Figure S2:** Peroxidase activity test using  $ABTS^{2-}$ .  $ABTS^{2-}$  is oxidized to  $ABTS^+$  radical cation (greenish color) by PS2.M-hemin 1× complex and 3× complex, in the presence of hydrogen peroxide. The peroxidase activity test was carried out in the presence of 10  $\mu$ g GO in both complexes.

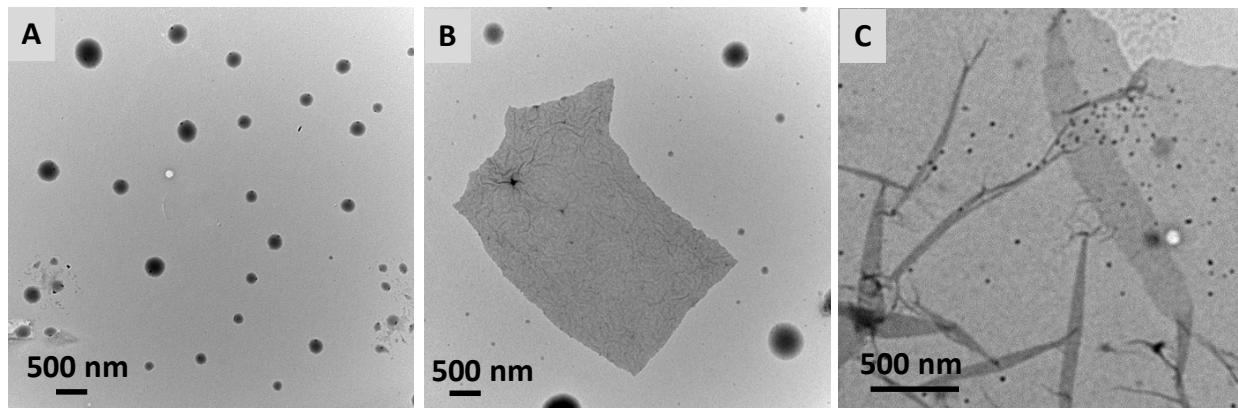

**Figure S3.** TEM images: (A) PS2.M-hemin 1× complex at day 0; (B) PS2.M-hemin 3× complex + GO at day 0; (C) Magnified image of (Figure 1B) PS2.M-hemin 3× complex + GO at day 0.

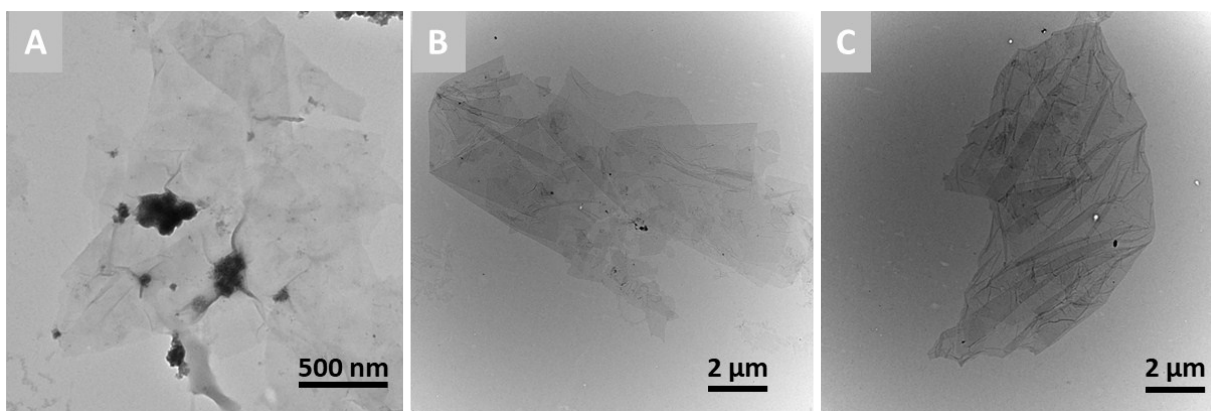

**Figure S4.** TEM images of control experiments using 1× complex. (A) 1× complex + GO without  $\text{H}_2\text{O}_2$  for 30 days; (B) Hemin + GO without  $\text{H}_2\text{O}_2$  for 30 days; and (C) GO +  $\text{H}_2\text{O}_2$  for 30 days.

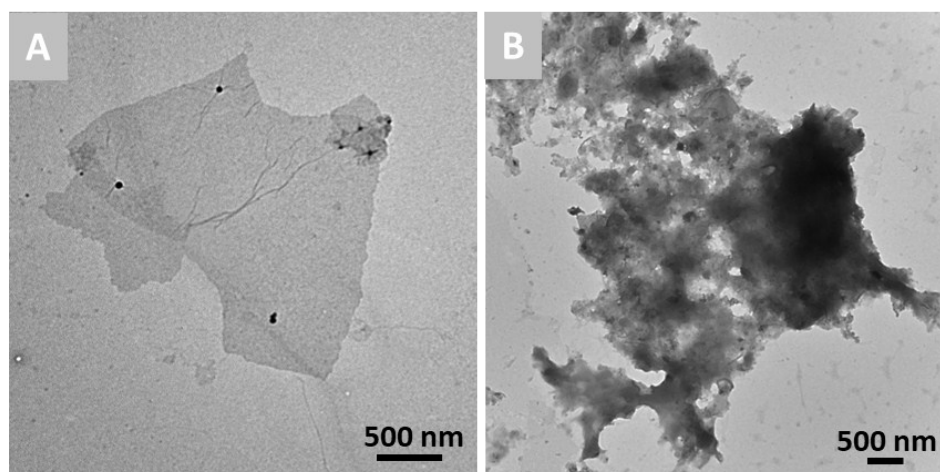

**Figure S5.** TEM images of control experiments using 3× complex. (A) 3× complex + GO without  $\text{H}_2\text{O}_2$  for 30 days; and (B) Hemin + GO +  $\text{H}_2\text{O}_2$  for 30 days.

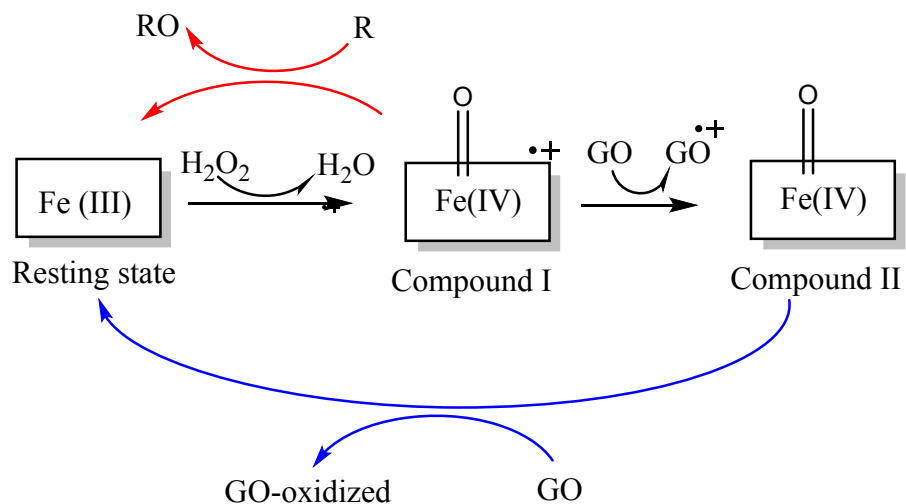

**Figure S6.** Two-electron oxidation mechanism catalyzed by hemin enzymes as reported earlier<sup>1</sup>. Red-arrows describe one-step or direct oxygen transfer oxidation mechanism.

## References

1. Poon, L. C. H., Methot, S. P., Morabi-Pazooki, W., Pio, F., Bennet, A. J. & Sen, D. Guanine-rich RNAs and DNAs that bind heme robustly catalyze oxygen transfer reactions. *J. Am. Chem. Soc.* **2011**, *133*, 1877-1884.
